# Supplementary material for: A Comparative Exploration of Quality Assurance Results by the Third-Party Pharmaceutical Education Evaluation in Japan
Source: PubMed Central journal article supplement (PMC7838897; doi:10.3390/pharmacy9010006), 2020-12-31
Supplement: pharmacy-09-00006-s001.pdf [file pharmacy-09-00006-s001.pdf]

**Supplementary 1 Assessment of 17 Public and 29 Old Private and 28 New Private Universities or Schools.**

| Assessments Areas                                         | All public 17 universities or colleges |                |                 |                   | All private 57 universities or colleges |                |                 |                   | Old private 29 universities or colleges |                |                 |                   | New private 28 universities or colleges (since 2003) |                |                        |                   |
|-----------------------------------------------------------|----------------------------------------|----------------|-----------------|-------------------|-----------------------------------------|----------------|-----------------|-------------------|-----------------------------------------|----------------|-----------------|-------------------|------------------------------------------------------|----------------|------------------------|-------------------|
|                                                           | Improvements                           | Improvements % | Recommendations | Recommendations % | Improvements                            | Improvements % | Recommendations | Recommendations % | Improvements                            | Improvements % | Recommendations | Recommendations % | Improvements                                         | Improvements % | Recommendations (n=28) | Recommendations % |
| <b>1. Mission &amp; Goals</b>                             | 3                                      | 17.6           | 11              | 64.7              | 19                                      | 33.3           | 46              | 80.7              | 8                                       | 27.6           | 21              | 72.4              | 11                                                   | 39.3           | 25                     | 89.3              |
| <b>2. Organization for Curriculum</b>                     | 4                                      | 23.5           | 12              | 70.6              | 41                                      | 71.9           | 45              | 78.9              | 19                                      | 65.5           | 21              | 72.4              | 22                                                   | 78.6           | 24                     | 85.7              |
| <b>3. Basic Contents of Medical Profession Education</b>  | 16                                     | 94.1           | 14              | 82.4              | 54                                      | 94.7           | 50              | 87.7              | 26                                      | 89.7           | 26              | 89.7              | 28                                                   | 100.0          | 24                     | 85.7              |
| <b>4. Pharmaceutical Education Curriculum</b>             | 15                                     | 88.2           | 12              | 70.6              | 42                                      | 73.7           | 46              | 80.7              | 18                                      | 62.1           | 23              | 79.3              | 24                                                   | 85.7           | 23                     | 82.1              |
| <b>5. Pharmacy Clerkship</b>                              | 14                                     | 82.4           | 9               | 52.9              | 48                                      | 84.2           | 41              | 71.9              | 23                                      | 79.3           | 22              | 75.9              | 25                                                   | 89.3           | 19                     | 67.9              |
| <b>6. Education for Nurturing Problem Solving Ability</b> | 15                                     | 88.2           | 13              | 76.5              | 56                                      | 98.2           | 45              | 78.9              | 28                                      | 96.6           | 23              | 79.3              | 28                                                   | 100.0          | 22                     | 78.6              |
| <b>7. Admission Policy and System for Acceptance</b>      | 0                                      | 0.0            | 10              | 58.8              | 34                                      | 59.6           | 40              | 70.2              | 12                                      | 41.4           | 18              | 62.1              | 22                                                   | 78.6           | 22                     | 78.6              |
| <b>8. Grading / Promotion / Graduation</b>                | 15                                     | 88.2           | 13              | 76.5              | 55                                      | 96.5           | 44              | 77.2              | 27                                      | 93.1           | 18              | 62.1              | 28                                                   | 100.0          | 26                     | 92.9              |
| <b>9. Student Services</b>                                | 4                                      | 23.5           | 12              | 70.6              | 12                                      | 21.1           | 41              | 71.9              | 6                                       | 20.7           | 20              | 69.0              | 6                                                    | 21.4           | 21                     | 75.0              |
| <b>10. Teacher Organization/Staff Organization</b>        | 2                                      | 11.8           | 14              | 82.4              | 25                                      | 43.9           | 53              | 93.0              | 9                                       | 31.0           | 26              | 89.7              | 16                                                   | 57.1           | 27                     | 96.4              |
| <b>11. Institutions / Facilities</b>                      | 0                                      | 0.0            | 2               | 11.8              | 3                                       | 5.3            | 23              | 40.4              | 1                                       | 3.4            | 9               | 31.0              | 2                                                    | 7.1            | 14                     | 50.0              |
| <b>12. Collaborative Relationships with Society</b>       | 0                                      | 0.0            | 4               | 23.5              | 0                                       | 0.0            | 40              | 70.2              | 0                                       | 0.0            | 17              | 58.6              | 0                                                    | 0.0            | 23                     | 82.1              |
| <b>13. Self-check / Self-evaluation</b>                   | 15                                     | 88.2           | 14              | 82.4              | 50                                      | 87.7           | 45              | 78.9              | 24                                      | 82.8           | 23              | 79.3              | 26                                                   | 92.9           | 22                     | 78.6              |
